# Supplementary material
Source: PubMed Central journal article supplement (PMC3486152)
Supplement: MCB.00481-12_zmb999109716so2.pdf [file MCB.00481-12_zmb999109716so2.pdf]

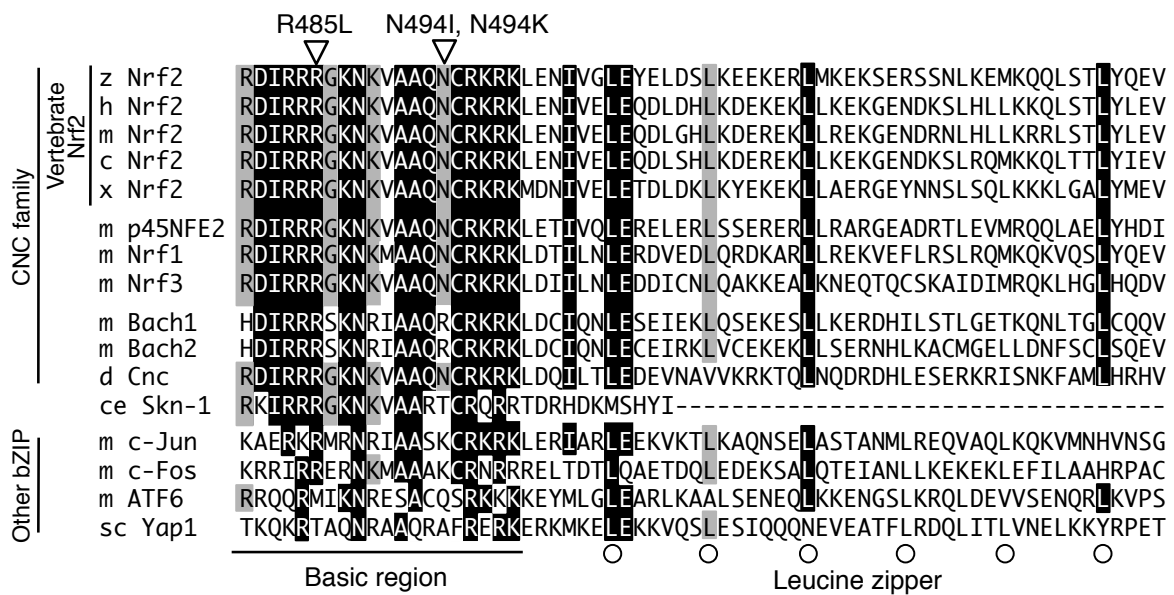

**Figure S2.** Comparison of the bZIP regions of vertebrate Nrf2 and other bZIP proteins. The amino acid sequence alignment of Nrf2 and other bZIP transcription factors. Identical amino acids in the Nrf proteins (Nrf2, p45NFE2, Nrf1 and Nrf3) and those in the CNC family proteins are highlighted in gray and black, respectively. The arrowheads indicate the positions of the missense mutations R485L, N494I, and N494K in zebrafish Nrf2. The basic region is indicated by the bar. The open circles indicate the positions of heptad repeats of leucine zippers. c, chicken; ce, *C. elegans*; d, *D. melanogaster*; h, human; m, mouse; sc, *S. cerevisiae*; x, *X. tropicalis*; z, zebrafish.
