# Supplementary material
Source: PubMed Central journal article supplement (PMC3486152)
Supplement: MCB.00481-12_zmb999109716so3.pdf [file MCB.00481-12_zmb999109716so3.pdf]

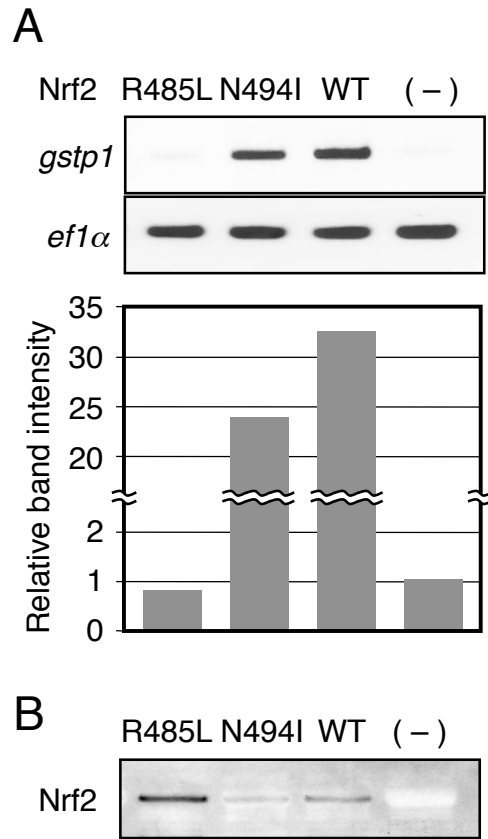

**Figure S3.** Comparison of *gstp1*-inducing activities of mutant Nrf2 proteins. **(A)** Wild-type Nrf2 (WT), Nrf2R485L and Nrf2N494I mRNA was injected into embryos at the one-cell stage. After 6 hours, the *gstp1* expression in embryos was analyzed by an RT-PCR analysis. The expression of *ef1α* was used to standardize the amount of cDNA. The relative ratios of the band intensity to the control (-) are shown. The band intensity was normalized to *ef1α*. **(B)** The expression of the wild-type and mutant Nrf2 proteins was confirmed by an immunoblot analysis using an anti-FLAG antibody.
