# Supplementary material
Source: PubMed Central journal article supplement (PMC3486152)
Supplement: MCB.00481-12_zmb999109716so5.pdf [file MCB.00481-12_zmb999109716so5.pdf]

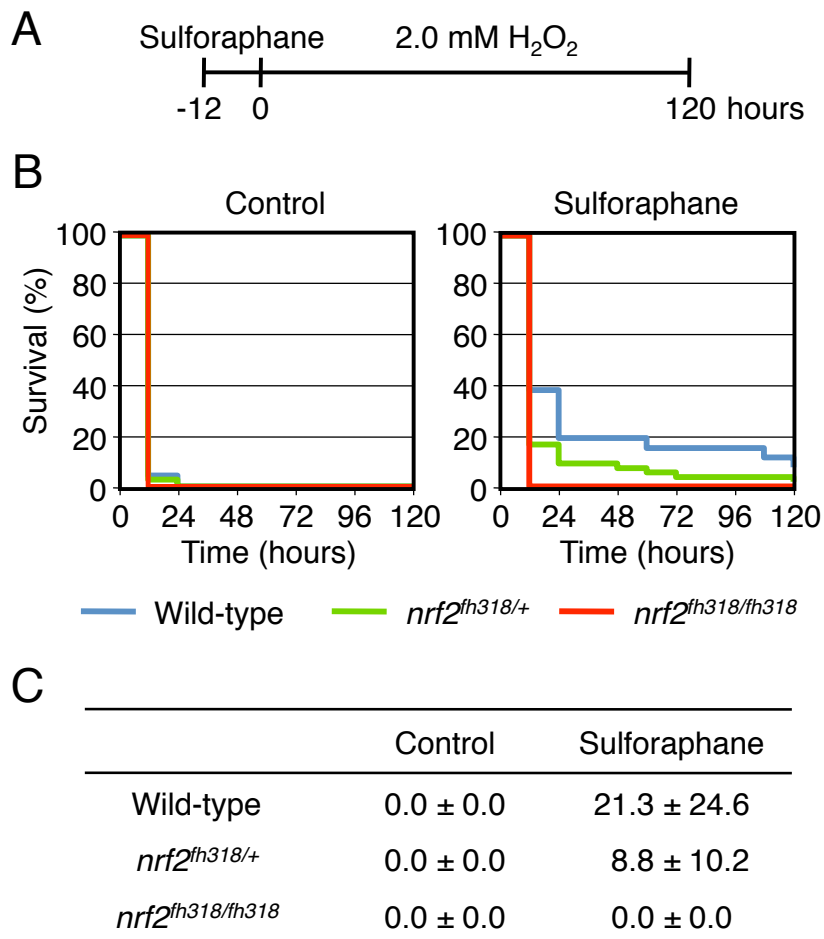

**Figure S5.** The effect of sulforaphane pretreatment on the survival rate of larvae treated with 2.0 mM H<sub>2</sub>O<sub>2</sub>. **(A)** The experimental scheme. After pretreatment with 40 μM sulforaphane for 12 hours, 4 dpf larvae were treated with 2.0 mM H<sub>2</sub>O<sub>2</sub> for 120 hours. **(B)** The survival curve of H<sub>2</sub>O<sub>2</sub>-treated larvae with or without sulforaphane pretreatment. The data were combined from four experiments. **(C)** The survival rates of wild-type, *nrf2*<sup>fh318/+</sup>, and *nrf2*<sup>fh318/fh318</sup> larvae at 24 hours post-exposure. Data are presented as mean ± standard deviations from four independent experiments.
