# Supplementary material
Source: PubMed Central journal article supplement (PMC3486152)
Supplement: MCB.00481-12_zmb999109716so6.pdf [file MCB.00481-12_zmb999109716so6.pdf]

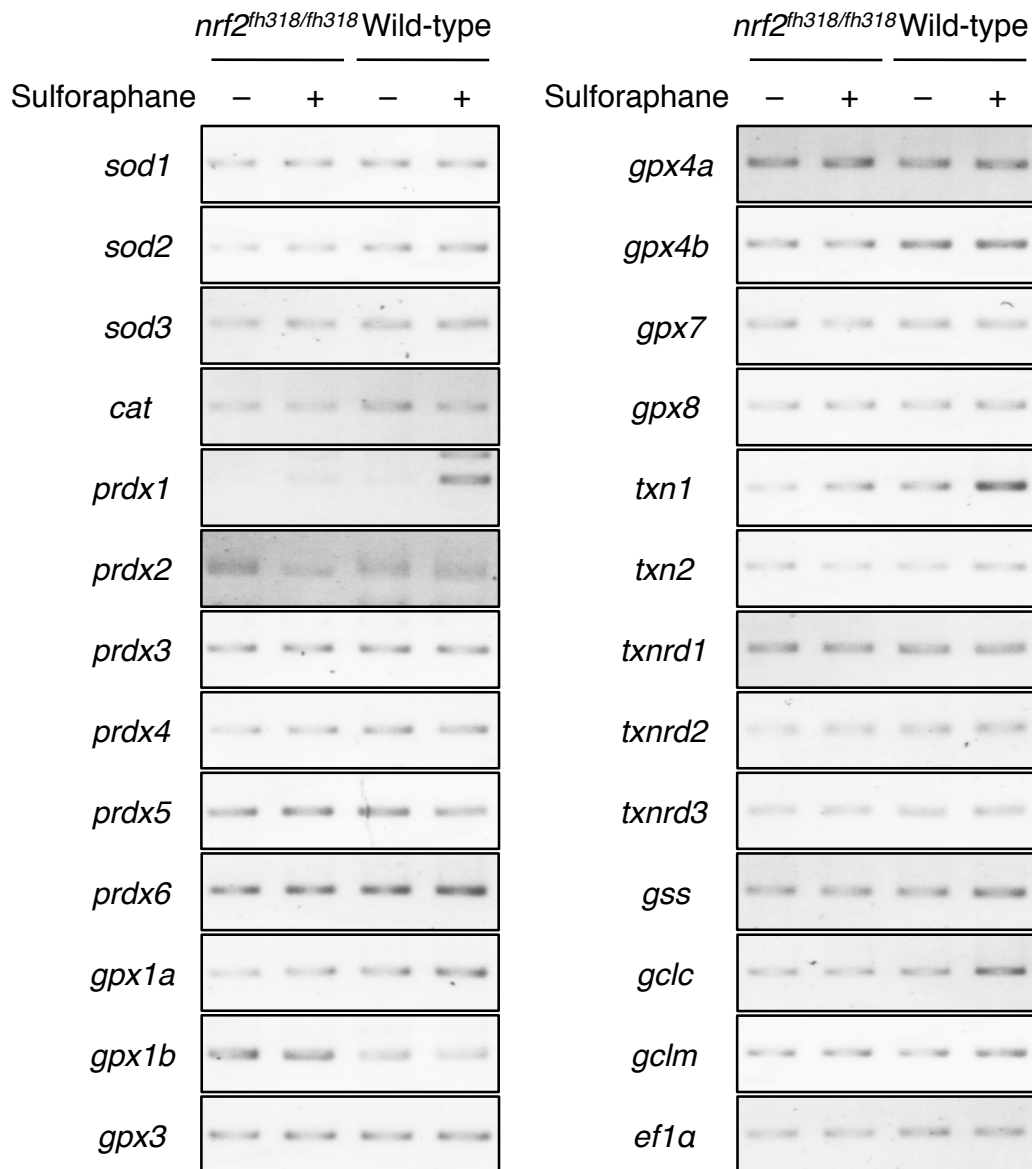

**Figure S6.** Induction of ROS-scavenging enzyme genes in sulforaphane-treated *nrf2*<sup>fh318/fh318</sup> and wild-type larvae. A semiquantitative RT-PCR analysis was performed using specific primers for the indicated genes, and total RNA mixtures from whole bodies of twenty *nrf2*<sup>fh318/fh318</sup> or wild-type larvae at 5 dpf treated with 40  $\mu$ M sulforaphane for 6 hours was evaluated. The expression of *ef1a* was used to standardize the amount of cDNA.
