# Supplementary material
Source: PubMed Central journal article supplement (PMC3486152)
Supplement: MCB.00481-12_zmb999109716so7.pdf [file MCB.00481-12_zmb999109716so7.pdf]

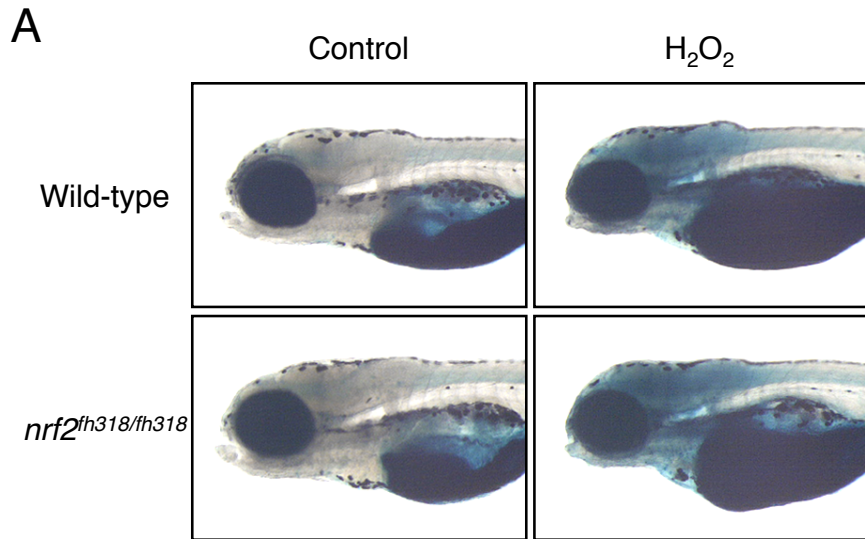

**B**

|                                   | Control   | H <sub>2</sub> O <sub>2</sub> |
|-----------------------------------|-----------|-------------------------------|
| Wild-type                         | 0% (n=58) | 100% (n=15)                   |
| <i>nrf2<sup>fh318/fh318</sup></i> | 0% (n=68) | 100% (n=16)                   |

**Figure S7.** SA- $\beta$ -gal activity of wild-type and *nrf2<sup>fh318/fh318</sup>* larvae. **(A)** SA- $\beta$ -gal staining was performed in 4 dpf larvae treated with or without 200  $\mu$ M H<sub>2</sub>O<sub>2</sub> from 6 hpf to 4 dpf. Lateral views, anterior to the left. H<sub>2</sub>O<sub>2</sub>-treated larvae, but not untreated larvae, showed high SA- $\beta$ -gal activity in both wild-type and *nrf2<sup>fh318/fh318</sup>*. **(B)** Percentages of larvae that showed high SA- $\beta$ -gal. Numbers of tested larvae are indicated in parentheses.
