# Supplementary material
Source: PubMed Central journal article supplement (PMC3486152)
Supplement: MCB.00481-12_zmb999109716so8.pdf [file MCB.00481-12_zmb999109716so8.pdf]

**Table S1.** Oligonucleotide primers used for semiquantitative RT-PCR analyses

| Gene                          | Forward primer             | Reverse primer                |
|-------------------------------|----------------------------|-------------------------------|
| <i>gstp1</i>                  | 5'-CTAGGAGCAGCTTTGAAACGCAC | 5'-CGTTGTTGGAGAATGTTGTACCGACG |
| <i>sod1</i>                   | 5'-TTAAAGGCACCGGTGAAGTG    | 5'-CCATGGTCTCCCAATAATAG       |
| <i>sod2</i>                   | 5'-ATGTGACAACCCAAGTCTCC    | 5'-CAGACATCTATCCCAAGCAG       |
| <i>sod3</i>                   | 5'-TTCAGGCCGTATGCAGAATG    | 5'-TTCCCAAAGAGAGTTGCAGG       |
| <i>cat</i>                    | 5'-TTCTGTTTCCGTCTTTCATCC   | 5'-AAGGTCTCTGATGGAGTAATC      |
| <i>prdx1</i>                  | 5'-TACTGCGGCAGATTACCATC    | 5'-GACACACTTTAGTCCTACAAC      |
| <i>prdx2</i>                  | 5'-TCAGCTCTCAGACTACAGAG    | 5'-TCAATCACAAACAGACCTCTG      |
| <i>prdx3</i>                  | 5'-TCTCAATCAGCGCTGCCAG     | 5'-GAATCTGGATTTTCCCAATC       |
| <i>prdx4</i>                  | 5'-CTGGGAAGGAACAGCAGTC     | 5'-GTGTGTGTCCCTGGTCCTC        |
| <i>prdx5</i>                  | 5'-CTCAATGGCTGAACTCTTCAG   | 5'-CAGCATGGCATACTTTGAG        |
| <i>prdx6</i>                  | 5'-CCGCCAAGCTTCATGAAGAG    | 5'-AACAACACGGAGAATCTCATC      |
| <i>gpx1a</i>                  | 5'-TTACACCCAGATGAACGAGC    | 5'-AGATGTCATTCTGCACACG        |
| <i>gpx1b</i>                  | 5'-GAATGTGGCTTCGCTCTGAG    | 5'-GCTTCTCCTTGAGGAAGGTG       |
| <i>gpx3</i>                   | 5'-TCTCTCATTACGCTGGAAAAC   | 5'-AACAGCCTGTTGCTGGTGG        |
| <i>gpx4a</i>                  | 5'-GAAGTTTCCCTGGAAAAGTAC   | 5'-CCATTTGATGCCATTTCCAAG      |
| <i>gpx4b</i>                  | 5'-TCTCAGCCATAGACATTGATG   | 5'-GCTCCTTCATCCACTTCCAG       |
| <i>gpx7</i>                   | 5'-CAGAGGCCGGTTAGTTTCTC    | 5'-CTCGACGAGGTATTTGTAAGC      |
| <i>gpx8</i>                   | 5'-CTCACTGGAGAAATACCGAG    | 5'-GGACTCACAAGAACTTCCAG       |
| <i>txn1</i>                   | 5'-CGAAATTGAAGATAAGGCTGC   | 5'-TGCGAGTTGATCTTCTCCTC       |
| <i>txn2</i>                   | 5'-CTCGTTCTCCTCCTGTTTTTC   | 5'-CAAACCTGGTCGATGACATCAC     |
| <i>txnr1</i>                  | 5'-GTGAAGTGTACGATTATGACC   | 5'-GTAGCCCCAGTTCAGTGAC        |
| <i>txnr2</i>                  | 5'-CTGGCTGGTTCGTTCCACTG    | 5'-AGCATTGAGTGGCATCTCTC       |
| <i>txnr3</i>                  | 5'-GTGAATGTGGGCTGTATTCC    | 5'-CAGTCGCCAGGACAACTG         |
| <i>gss</i>                    | 5'-GAGTTTTGGTGGTCTTGCTTC   | 5'-ATGGCTACCTCATGGCCATC       |
| <i>gclc</i>                   | 5'-CCAAGAAACATGCTGACCAC    | 5'-GTCAGAGTGCTGAATCTTGG       |
| <i>gclm</i>                   | 5'-AGCTTCAAGACTGCATTCAAG   | 5'-TGCCGATGGCAGCAATCTTC       |
| <i>efl<math>\alpha</math></i> | 5'-GCCCTGCCAATGTA          | 5'-GGGCTTGCCAGGGAC            |

\*Gene names are based on the ZFIN nomenclature (<http://zfin.org>) except *txn1*, *gpx8* and *efl $\alpha$*  (listed as *txn*, *zgc:56280* and *eefl $\alpha$ 111*, respectively, in ZFIN).
