# Supplementary material
Source: PubMed Central journal article supplement (PMC3486152)
Supplement: MCB.00481-12_zmb999109716so9.pdf [file MCB.00481-12_zmb999109716so9.pdf]

**Table S2.** TaqMan probes and oligonucleotide primers used for real-time RT-PCR analyses

|              |                |                               |
|--------------|----------------|-------------------------------|
| <i>prdx1</i> | TaqMan probe   | 5'-CAGGCCTTTCAGTTCACCGATAAGCA |
|              | Forward primer | 5'-TTGACGACAAGGGCATACTG       |
|              | Reverse primer | 5'-CTTTTCCAGGCTTCCATCC        |
| <i>txn1</i>  | TaqMan probe   | 5'-GACCATCGGGCCGTACTTTAAATTGC |
|              | Forward primer | 5'-AGTTGGTGGTGGTGGACTTC       |
|              | Reverse primer | 5'-CACATCCACCTTTAGAAACACC     |
| <i>gclc</i>  | TaqMan probe   | 5'-CCATTCTATCGGGGTTTTGTGTCCG  |
|              | Forward primer | 5'-GGCCACTTTCTGTCCCATAG       |
|              | Reverse primer | 5'-CCACAGATGCAGAGATAACACC     |
| <i>sod1</i>  | TaqMan probe   | 5'-TTCCACGTCCATGCTTTTGGTGAC   |
|              | Forward primer | 5'-GAAAAGAAGCCAGTGAAGGTG      |
|              | Reverse primer | 5'-GCCACCATGAGTTTTGTC         |
| <i>sod2</i>  | TaqMan probe   | 5'-CCAAGGGTGATGTGACAACCCAAGT  |
|              | Forward primer | 5'-AGTTCATCACAGCAAGCAC        |
|              | Reverse primer | 5'-TTTCAATGCAGGCTGAAGG        |
| <i>sod3</i>  | TaqMan probe   | 5'-CATTTTACCCCTTCTGGCATTCTGC  |
|              | Forward primer | 5'-GCAAAGGACCAACAACAAG        |
|              | Reverse primer | 5'-ACAGAAGAGCACATGGCAAC       |
| <i>gpx1b</i> | TaqMan probe   | 5'-TTGAAGTACGTCCGTCCTGGCAATG  |
|              | Forward primer | 5'-CTCGTGGTTCTGGGTGTTT        |
|              | Reverse primer | 5'-GCTGGAATTTGGGCTCATAG       |
| <i>efla</i>  | TaqMan probe   | 5'-AGCAAGAACGACCCACCCATGGAG   |
|              | Forward primer | 5'-CGTGGTAATGTGGCTGGAGA       |
|              | Reverse primer | 5'-CTGAGCGTTGAAGTTGGCAG       |

\*Gene names are based on the ZFIN nomenclature (<http://zfin.org>) except *txn1* and *efla* (listed as *txn* and *efla111*, respectively, in ZFIN).
